# Supplementary material for: Reassessing destructive quantum interference in azulene-based devices
Source: Royal Society of Chemistry journal article supplement (doi:10.1039/c9cp06159b), 2020-01-01
Supplement: c9cp06159b1.pdf [file c9cp06159b1.pdf]

## Supplementary Information for:

### Reassessing destructive quantum interference in azulene-based devices

Supplementary Table S1: Optimized bond lengths of each system (Å), molecular length (Å) and the zero-bias conductance ( $\mu\text{S}$ ) for the two-probe systems.

| Junction  | C $\equiv$ C | C—C  | S—S   | $G$ ( $\mu\text{S}$ ) |
|-----------|--------------|------|-------|-----------------------|
| 2,6Az-I   |              |      | 8.80  | 15.46                 |
| 2,6Az-II  | 1.24         | 1.41 | 13.94 | 9.79                  |
| 2,6Az-III |              | 1.47 | 17.48 | 0.75                  |
| 2,6Az-IV  | 1.23         | 1.38 | 22.36 | 5.42                  |
| 4,7Az-I   |              |      | 6.74  | 13.17                 |
| 4,7Az-II  | 1.24         | 1.42 | 11.75 | 10.73                 |
| 4,7Az-III |              | 1.47 | 15.06 | 0.12                  |
| 4,7Az-IV  | 1.21         | 1.42 | 20.03 | 0.50                  |
| 1,3Az-I   |              |      | 5.65  | 10.85                 |
| 1,3Az-II  | 1.24         | 1.39 | 11.75 | 10.81                 |
| 1,3Az-III |              | 1.47 | 18.56 | 0.07                  |
| 1,3Az-IV  | 1.22         | 1.42 | 18.56 | 0.07                  |
| 5,7Az-I   |              |      | 5.40  | 3.48                  |
| 5,7Az-II  | 1.23         |      | 8.37  | 2.27                  |
| 5,7Az-III |              | 1.40 | 12.10 | 0.01                  |
| 5,7Az-IV  | 1.21         | 1.42 | 16.03 | 0.01                  |

## Supplementary Note 1 | Sample Input Files for Calculations.

### 1) Siesta

Version: 3.2-pl-5

M1 SCF input file:

```
# -----  
# Name and Label  
# -----  
SystemName      2,6Az-I  
SystemLabel     2,6Az-I.file  
# -----
```

```

# Lattice
#-----
LatticeConstant      1.00 Ang
%block LatticeVectors
4.44417      7.69752      0.000000
8.88833      0.000000      0.000000
0.000000     0.000000      33.9459508971
%endblock LatticeVectors
#-----
# Species and Atoms
#-----
NumberOfSpecies      4
NumberOfAtoms        54
%block ChemicalSpeciesLabel
1  pseudos/H-gga
6  pseudos/C-gga
16 pseudos/S-gga
79 pseudos/Au-gga
%endblock ChemicalSpeciesLabel
#-----
# Atomic Coordinates
#-----
AtomicCoordinatesFormat Ang
%block AtomicCoordinatesAndAtomicSpecies
2.962777000004      5.131681000003      8.466837000005      4
1.481389            2.565840999998      8.466837000005      4
0.                  0.                  8.466837000005      4
5.925554999997     5.131681000003      8.466837000005      4
4.444166000003     2.565840999998      8.466837000005      4
2.962777000003     0.                  8.466837000005      4
8.888332           5.131681000003      8.466837000005      4

```

|                |                |                 |   |
|----------------|----------------|-----------------|---|
| 7.406943999996 | 2.565840999998 | 8.466837000005  | 4 |
| 5.925554999996 | 0.             | 8.466837000005  | 4 |
| 4.444166000005 | 5.986961000002 | 10.885935000022 | 4 |
| 2.962777000001 | 3.421120999997 | 10.885935000022 | 4 |
| 1.481389       | 0.855279999999 | 10.885935000022 | 4 |
| 7.406943999998 | 5.986961000002 | 10.885935000022 | 4 |
| 5.925554999994 | 3.421120999997 | 10.885935000022 | 4 |
| 4.444166000003 | 0.855279999999 | 10.885935000022 | 4 |
| 10.369721      | 5.986961000002 | 10.885935000022 | 4 |
| 8.888331999997 | 3.421120999997 | 10.885935000022 | 4 |
| 7.406943999996 | 0.855279999999 | 10.885935000022 | 4 |
| 7.406943666669 | 4.276401000004 | 12.573935000014 | 3 |
| 5.745433813692 | 3.112999157519 | 14.300929231871 | 1 |
| 9.221429628163 | 5.546919098533 | 14.319152453981 | 1 |
| 7.481638860727 | 4.328703143283 | 14.363250359839 | 2 |
| 6.443210212706 | 3.60158750191  | 14.977142965564 | 2 |
| 8.515815741791 | 5.052841665079 | 14.981595535873 | 2 |
| 6.178258052876 | 3.416065983416 | 16.332047042944 | 2 |
| 8.771023835745 | 5.231540314498 | 16.342309363745 | 2 |
| 5.304136504014 | 2.803999423185 | 16.549732186211 | 1 |
| 9.644206989952 | 5.84294980365  | 16.566561748227 | 1 |
| 6.862866117564 | 3.895433759905 | 17.452409562586 | 2 |
| 8.081771455128 | 4.748920552653 | 17.455597511565 | 2 |
| 6.524490386756 | 3.658500498288 | 18.793193162151 | 2 |
| 8.414660496399 | 4.982011992503 | 18.800987161222 | 2 |
| 5.683899378967 | 3.069912278071 | 19.138808802918 | 1 |
| 9.25442510153  | 5.570021559291 | 19.150385135747 | 1 |
| 7.468454678749 | 4.319471478735 | 19.609132626638 | 2 |
| 7.406943666669 | 4.276401000001 | 21.37201589707  | 3 |
| 4.444166000005 | 5.986960999999 | 23.060015897062 | 4 |
| 2.962777000001 | 3.421120999994 | 23.060015897062 | 4 |

```

1.481389      0.85527999997  23.060015897062  4
7.40694399998  5.98696099999  23.060015897062  4
5.925554999994  3.421120999994  23.060015897062  4
4.444166000003  0.85527999997  23.060015897062  4
10.369721     5.98696099999  23.060015897062  4
8.888331999997  3.421120999994  23.060015897062  4
7.406943999996  0.85527999997  23.060015897062  4
2.962777000003  6.84224099999  25.479113897079  4
1.481389000003  4.276401000001  25.479113897079  4
-0.000000000001  1.710559999996  25.479113897079  4
5.925555000005  6.84224099999  25.479113897079  4
4.444166000006  4.276401000001  25.479113897079  4
2.962777000001  1.710559999996  25.479113897079  4
8.888331999999  6.84224099999  25.479113897079  4
7.406943999999  4.276401000001  25.479113897079  4
5.925554999995  1.710559999996  25.479113897079  4
%endblock AtomicCoordinatesAndAtomicSpecies
#-----
# Calculator
# -----
#-----
# Exchange-Correlation
#-----
SolutionMethod      diagon
XC.functional       GGA
XC.authors          PBE
PAO.BasisSize       DZP
MeshCutoff          300.0 Ry
DM.Tolerance        1.d-5
%block kgrid_Monkhorst_Pack
6 0 0 0.0

```

```
0 6 0 0.0
0 0 7 0.0
%endblock kgrid_Monkhorst_Pack
```

## 2) Nanodcal

Electrode SCF input file:

```
system.name = ' 2,6Az-I '
system.spinType = ' NoSpin '
system.orbitalType = ' DZP '
system.atomCoordinateFormat = ' cartesian '
system.atomFile = ' ./2,6Az-I-elec.xyz '
system.centralCellVectors = ' [[4.44417 7.69752 0.0],[8.88833 0.0 0.0],[0.0 0.0 7.25728999999]] '
calculation.name = ' scf '
calculation.SCF.startingMode = ' H '
calculation.SCF.mixingMode = ' H '
calculation.SCF.donatorObject = ' NanodcalObject.mat '
calculation.control.precision = 'high'
calculation.k_spacegrids.number = [6,6,100]
calculation.xcFunctional.Type = ' GGA_PBE96 '
```

Central region SCF input file:

```
system.name = ' 2,6Az-I '  
system.spinType = ' NoSpin '  
system.orbitalType = ' DZP '  
system.centralCellVectors = '[[8.888330 0.0 0.0],[4.444170 7.697520 0.0],[0.0 0.0 45.102908]] '  
system.atomFile = ' 2,6Az-I.xyz '  
calculation.name = ' scf '  
calculation.SCF.donatorObject = ' NanodcalObject.mat '  
system.numberOfLeads = 2  
system.typeOfLead1 = left  
system.objectOfLead1 = ../2,6Az-I_elec/NanodcalObject.mat  
system.typeOfLead2 = right  
system.objectOfLead2 = ../2,6Az-I_elec/NanodcalObject.mat  
calculation.control.precision = ' high '  
calculation.k_spacegrids.number = [6,6,1]  
calculation.xcFunctional.Type = GGA_PBE96
```
